# Supplementary material for: Inhibition of 13-cis retinoic acid-induced gene expression of reactive-resistance genes by thalidomide in glioblastoma tumours in vivo
Source: PubMed Central journal article supplement (PMC4745702; doi:10.18632/oncotarget.4727), 2015-07-30
Supplement: oncotarget-06-28938-s001.pdf [file oncotarget-06-28938-s001.pdf]

## SUPPLEMENTARY FIGURE AND TABLE

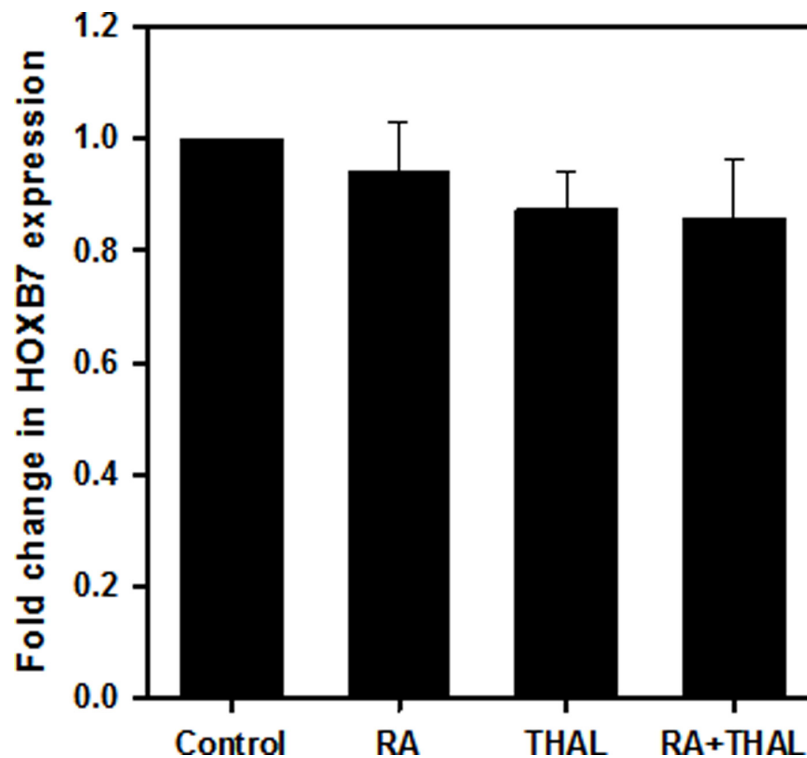

**Supplementary Figure S1: Fold change in HOXB7 gene expression in tumours after treatment with RA, THAL, or the combination, RA + THAL.** No significant change in expression was observed (mean values and std. errors;  $n = 3$ ).

**Supplementary Table S1: Gene Set Enrichment analysis of pathways differentially regulated in U251 xenografts treated with RA and THAL as sole agents, or in combination, RA+THAL, relative to untreated controls.** SIZE: number of genes in the pathway; ES: enrichment score; NES: normalized enrichment score; NOM  $p$ -val: nominal  $p$ -value; FDR  $p$ -val: false discovery rate  $p$ -value.
